# Supplementary material for: circRNA Profiling Reveals an Abundant circFUT10 that Promotes Adipocyte Proliferation and Inhibits Adipocyte Differentiation via Sponging let-7
Source: PubMed Central journal article supplement (PMC7163053; doi:10.1016/j.omtn.2020.03.011), 2020-03-30
Supplement: mmc1.pdf [file mmc1.pdf]

OMTN, Volume 20

## **Supplemental Information**

### **circRNA Profiling Reveals an Abundant circFUT10 that Promotes Adipocyte Proliferation and Inhibits Adipocyte Differentiation via Sponging let-7**

**Rui Jiang, Hui Li, Jiameng Yang, Xuemei Shen, Chengchuang Song, Zhaoxin Yang, Xiaogang Wang, Yongzhen Huang, Xianyong Lan, Chuzhao Lei, and Hong Chen**

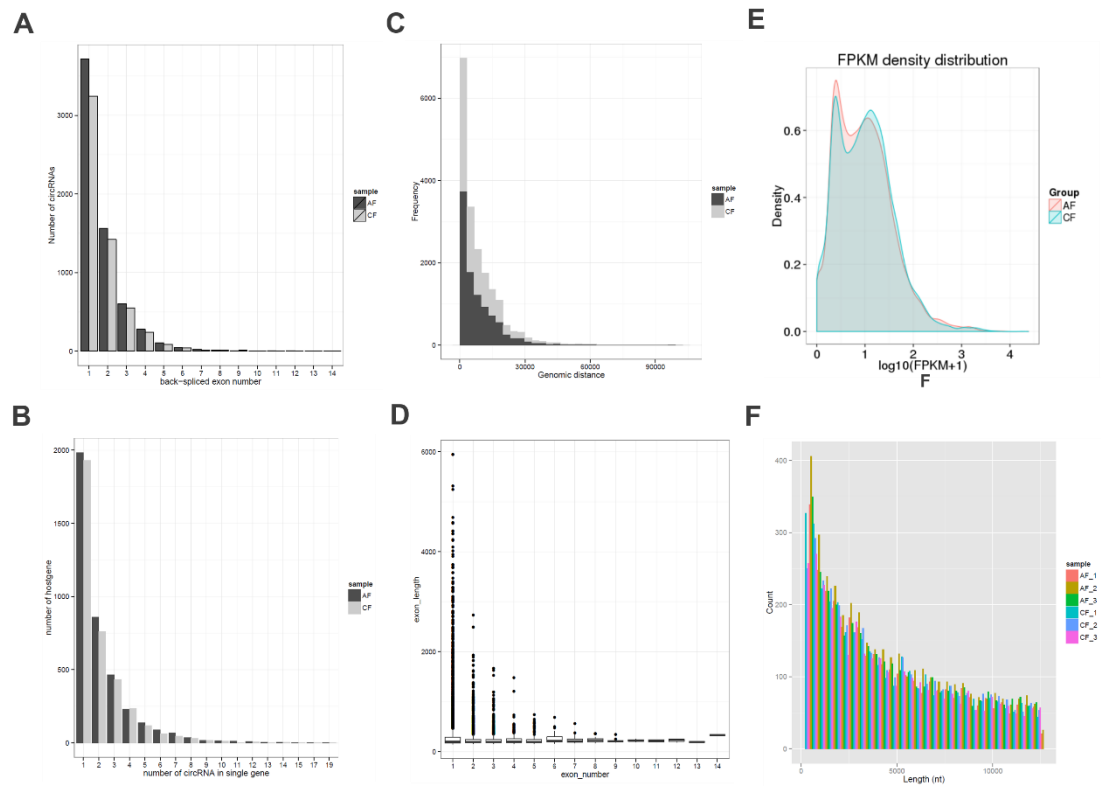

**Figure S1.**

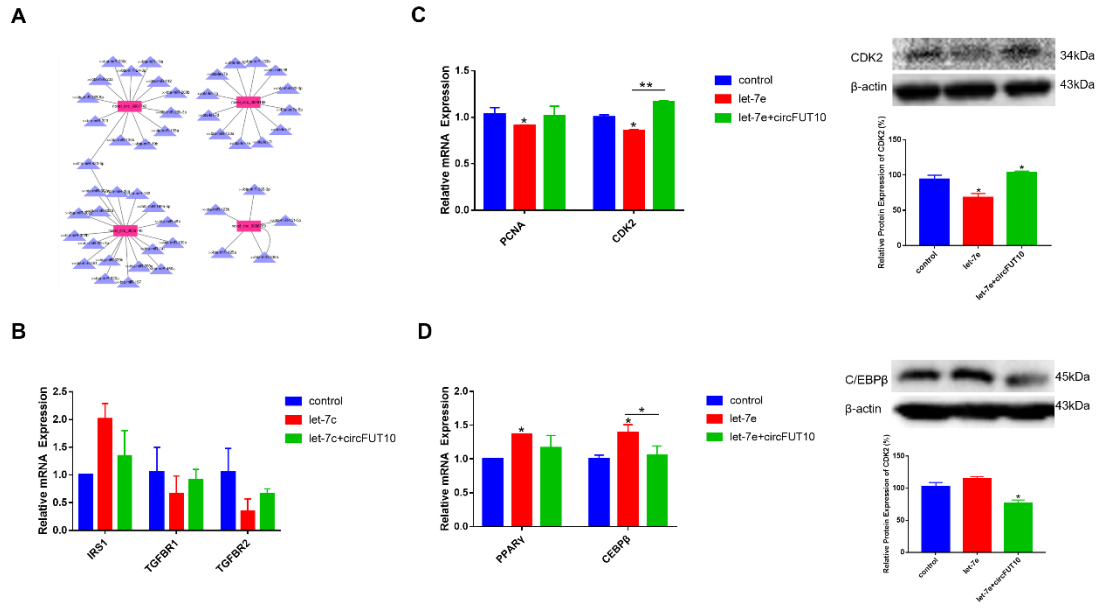

**Figure S2.**

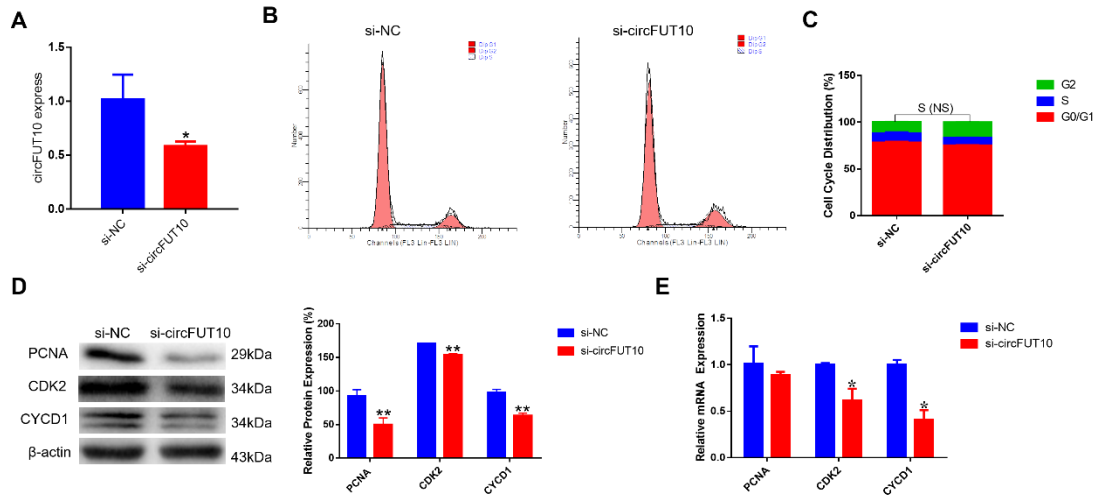

**Figure S3.**

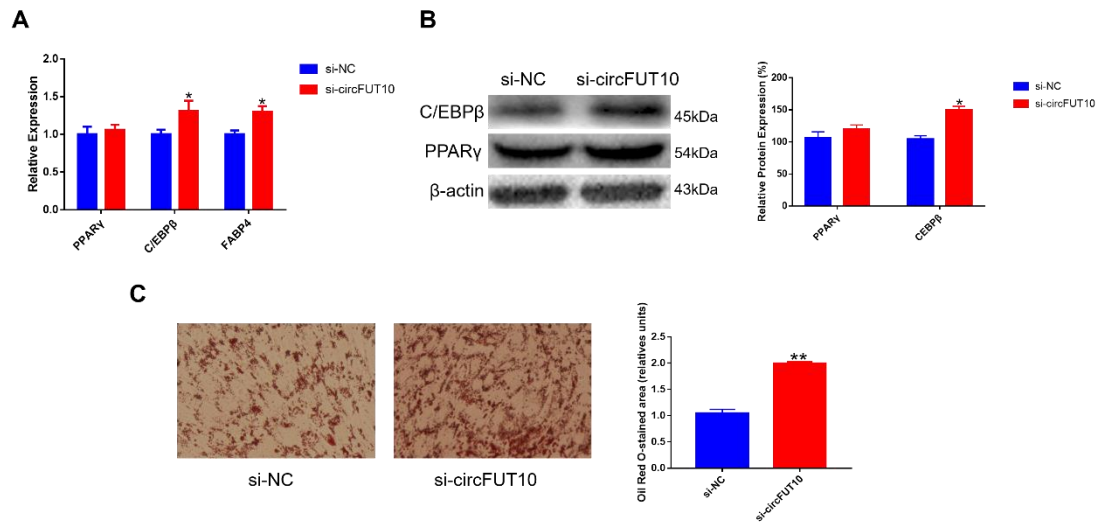

**Figure S4.**

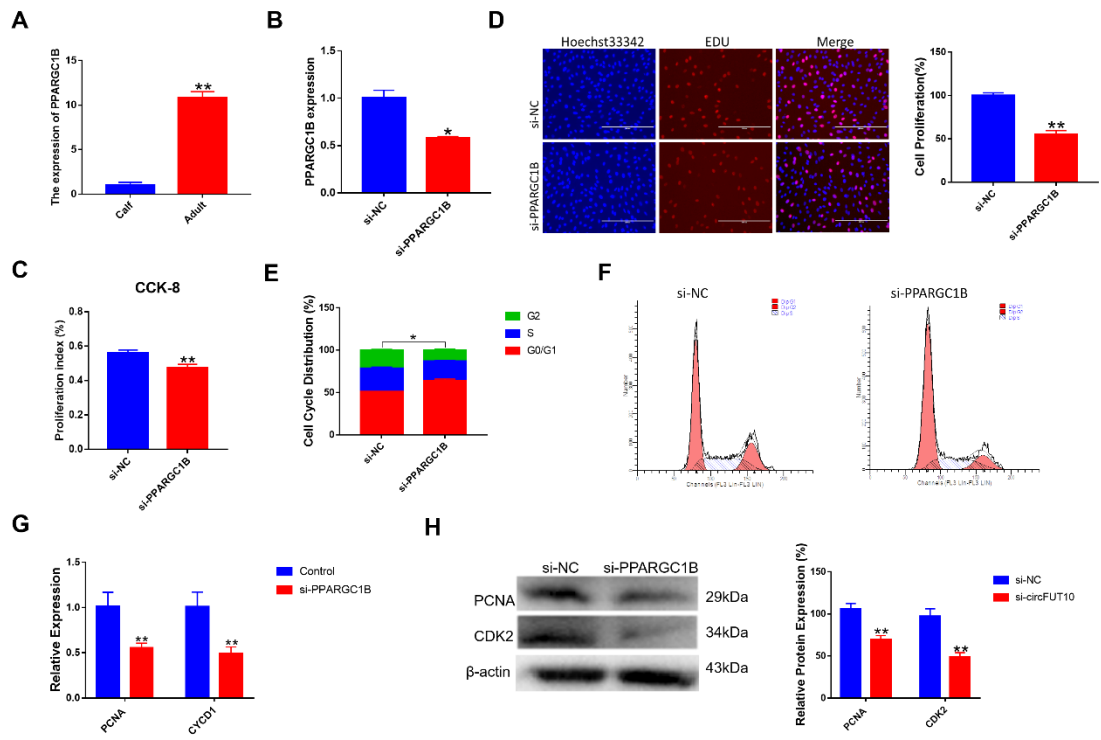

**Figure S5.**

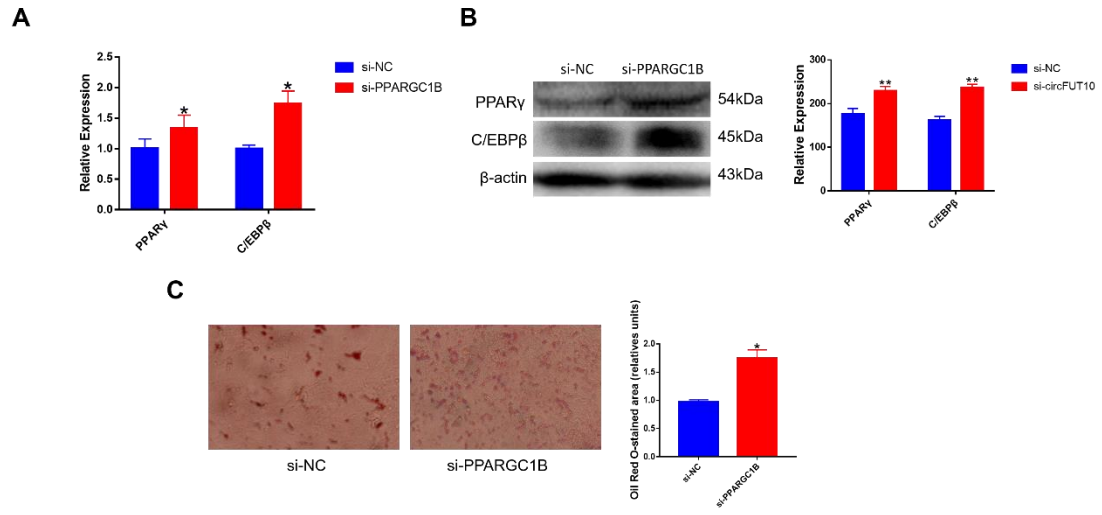

**Figure S6.**

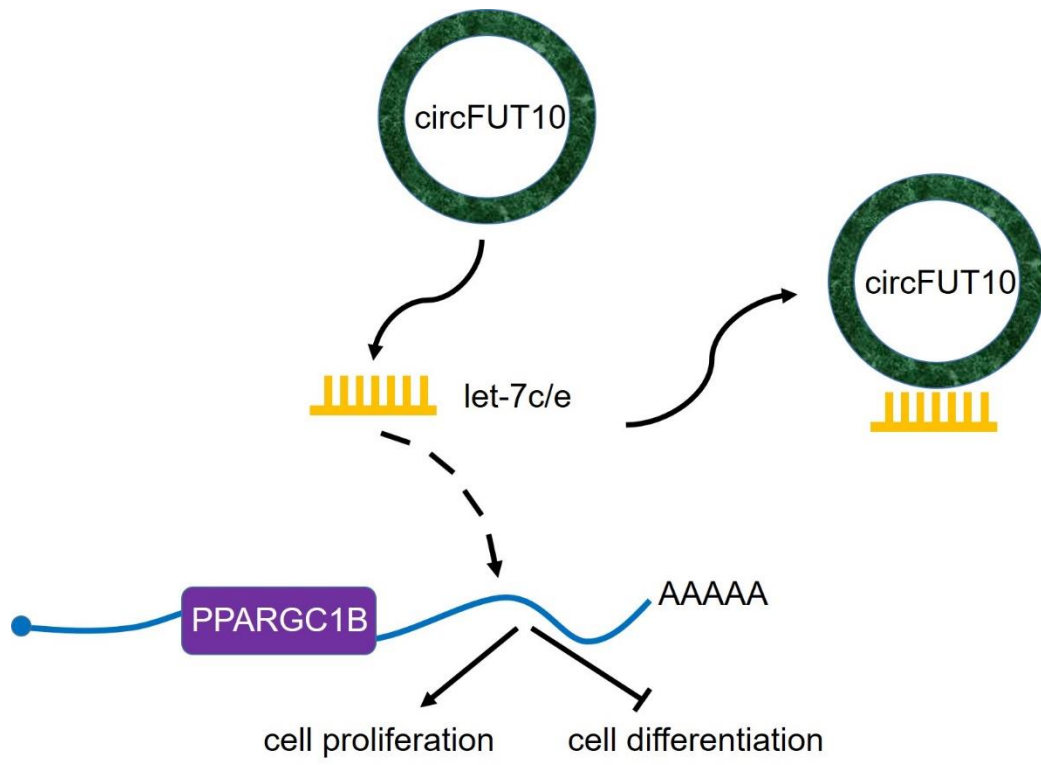

**Figure S7.**



Figure S1. Characteristics of circular RNA in bovine fatty tissues. (A) The exon number of highly expressed circRNAs between adult period and calf fatty tissues; (B) Numbers of circRNAs produced by the same gene; (C) The genomic distance of the back-splicing site in most circRNAs is within 50 kb, with only a few circRNAs spanning >100 kb; (D-F) Exon length of circRNA.

Figure S2. (A) Competing endogenous RNA network in bovine fatty tissues. (B) The circFUT10 attenuates the effects of let-7c on IRS1, TGFBR1 and TGFBR2 genes. (C) The expression of proliferating cell nuclear antigen (PCNA) and cyclin-dependent-kinase 2 (CDK2) were detected by qPCR and Western blot. (D) The expression levels of PPAR $\gamma$ , C/EBP $\beta$  in bovine adipocyte were determined by qPCR and western blot. Quantitative analysis of western blot was performed using Image J. Values are mean  $\pm$  SEM for three biological replicates; \* $P < 0.05$ ; \*\* $P < 0.01$

Figure S3. si-circFUT10 inhibits fat cells proliferation. (A) Interference efficiency of si-circFUT10. (B-C) Bovine fat cells were transfected with si-circFUT10 and cell phases were analyzed by flow cytometry. (D-E) The expression of CDK2, PCNA and CYCD1 were detected by Western blots and qPCR. The quantitative analysis of Western blot was performed using Image J. \* $P < 0.05$ ; \*\* $P < 0.01$ .

Figure S4. si-circFUT10 promotes adipocyte differentiation. (A-B) Bovine fat cells were transfected with si-circFUT10 and the expression of PPAR $\gamma$ , C/EBP $\beta$  and FABP4 were detected by qPCR and Western blot. (C) Overexpression of si-circFUT10 promotes adipogenesis, as indicated by Oil Red O staining. The quantitative analysis of Western blot and Oil Red O were performed using Image J. \* $P < 0.05$ ; \*\* $P < 0.01$ .

Figure S5. Effect of PPARGC1B gene on cell proliferation. (A) The expression of PPARGC1B gene in calf and adult fat tissues. (B) The efficiency of PPARGC1B knockdown was evaluated by qPCR. (C-D) si-PPARGC1B was transfected into bovine adipocytes for 24 hours, cell proliferation analysis using cell counting kit-8 (CKK-8) and EdU incorporation assays. The scale bars represent 100  $\mu$ m. (E-F) Bovine primary fat cells were transfected with si-PPARGC1B, and cell phases were analyzed by flow cytometry. (G) The expression of proliferating cell nuclear antigen (PCNA) and cyclin D1 (CYCD1) were detected by qPCR. (H) The expression of proliferating cell nuclear antigen (PCNA) and cyclin-dependent-kinase 2 (CDK2) were detected by Western blot, quantitative analysis of Western blot was performed using Image J. Values are mean  $\pm$  SEM for three biological replicates; \* $P < 0.05$ ; \*\* $P < 0.01$ .

Figure S6. Effect of PPARGC1B gene on bovine adipocyte differentiation. (A-B) si-PPARGC1B was transfected into bovine adipocytes and induced to differentiate for six days. The expression of PPAR $\gamma$ , C/EBP $\beta$  were detected by qPCR and Western blot. (C) Oil Red O staining was detected in the group of si-NC and si-PPARGC1B, and quantitative analysis of Western blot and Oil Red O was performed using Image J. \* $P < 0.05$ ; \*\* $P < 0.01$ .

Figure S7. Model of the action circFUT10 competitively sponging let-7 promotes adipocytes proliferation and inhibits adipocytes differentiation.

Table S2 The prediction of  $\Delta G$ 

| name      | let-7 family | sequence                | $\Delta G$ (kcal/mol) |
|-----------|--------------|-------------------------|-----------------------|
| circFUT10 | bta-let-7a   | ugagguaguagguuguauaguu  | -22.4                 |
|           | bta-let-7b   | ugagguaguagguuguguguu   | -28.3                 |
|           | bta-let-7c   | ugagguaguagguuguauguu   | -28.9                 |
|           | bta-let-7d   | agagguaguagguugcauaguu  | -22.6                 |
|           | bta-let-7e   | ugagguaggagguuguauagu   | -25.9                 |
|           | bta-let-7f   | ugagguaguaguuuguauaguu  | -16.4                 |
|           | bta-let-7g   | ugagguaguaguuuuguacaguu | -20.0                 |
|           | bta-let-7i   | ugagguaguaguuuugucuguu  | -25.3                 |

Table S3 primers for vector construction

| Name                     | Primer sequence 5'→3'                |
|--------------------------|--------------------------------------|
| pCD2.1-circFUT10-F       | GGGGTACCGTCGTGGTTGAGCTGGGAA          |
| Pcd2.1-circFUT10-R       | GGGGATCCCATAGAAGAGGAAGGCTTTG         |
| psiCHECK2-circFUT10-F    | CCGCTCGAGGCACAAATGGAAGCAGAG          |
| psiCHECK2-circFUT10-R    | ATAAGAATGCGGCCGCGCTTTGGTCCTGTGATGA   |
| psiCHECK2-PPARGC1B-Mut-F | CCGCTCGAGAAGTGCGGTAGTAGCTGAC         |
| psiCHECK2-PPARGC1B-Mut-R | CCGCTCGAGGAATACGCGAATGAGCTAGAC       |
| psiCHECK2-PPARGC1B-Wut-F | CCGCTCGAGAACAGCCTTAACCTTCGAGGA       |
| psiCHECK2-PPARGC1B-Wut-R | ATAAGAATGCGGCCGCTGAACACAGCTGCACGTCTA |
| pcDNA3.1-let-7b-F        | ATGGTACCGACGGCGGACCCTCTCAC           |
| pcDNA3.1-let-7b-R        | TAGGATCCACGTCACTGGGCCCCT             |
| pcDNA3.1-let-7c-F        | GGGGTACCATCCTTGCCAAGTCCTTAGGTG       |
| pcDNA3.1-let-7c-R        | CGGGATCCCTTCTTGCACAGAAATTGGCTCA      |
| pcDNA3.1-let-7e-F        | GGGGTACCCGAGAGACTGACTCCTGGGTT        |
| pcDNA3.1-let-7e-R        | CGGGATCCGGGGAGAAAGGAAAGGGACAAG       |
| pcDNA3.1-let-7i-F        | GGGGTACCGTCCTTAGGTGTATGGCTGC         |
| pcDNA3.1-let-7i-R        | CGGGATCCACAAGCGATCAGAAATACCATCTTG    |

Table S4 primers for qPCR

| Gene           | Primer pairs sequences (5'-3') | Amplification length (bp) |
|----------------|--------------------------------|---------------------------|
| GAPDH          | F: TGAGGACCAGGTTGTCTCCTGCG     | 145                       |
|                | R: CACCACCCTGTTGCTGTAGCCA      | 145                       |
| PPAR $\gamma$  | F: AGGATGGGGTCCTCATATCC        | 121                       |
|                | R: GCGTTGAACTTCACAGCAAA        | 121                       |
| C/EBP $\alpha$ | F: TGGACAAGAACAGCAACGAG        | 130                       |
|                | R: TTGTCACTGGTCAGCTCCAG        | 130                       |
| C/EBP $\beta$  | F: AAGATGCGCAACCTGGAGAC        | 124                       |
|                | R: GCGTCTTGAACAAGTTCCGC        | 124                       |
| circFUT10      | F: GCGGATGCTTGCTTCTTC          | 172                       |
|                | R: GAGGCTCTGCTTCCATTGT         | 172                       |
| FUT10          | F: GGACATGCACAAATGGAAGCAG      | 197                       |
|                | R: TAGGTCCGGTTGATGGTGAA        | 197                       |
| PCNA           | F: TCCAGAACAAGAGTATAGC         | 94                        |
|                | R: TACAACAGCATCTCCAAT          | 94                        |
| CDK2           | F: TTTGCTGAGATGGTGACCCG        | 115                       |
|                | R: TAACTCCTGGCCAAACCACC        | 115                       |
| cyclinD1       | F: CCGTCCATGCGGAAGATC          | 108                       |
|                | R: CAGGAAGCGGTCCAGGTAG         | 108                       |
| PPARGC1B       | F: AGCTCTTCCAGATAATCGACAG      | 97                        |
|                | R: GCAGCCAGACTCACAACATC        | 97                        |
| IRS1           | F: TCAAGAGTGCCACCTCAAC         | 185                       |
|                | R: GGTCTTCATTCTGCTGTGATGTC     | 185                       |
| TGFB $\beta$ 1 | F: GAGGCAACGCCATTACAGTG        | 166                       |
|                | R: CAAATGGCCTGTCTCGTGGA        | 166                       |
| TGFB $\beta$ 2 | F: CCCAAGTCGGTTAACAGCGA        | 85                        |
|                | R: GCACGTCGCAGAACTTACAC        | 85                        |

## supplementary methods file

### Genome reference and software used to assess linear species

The libraries we used were depleted of ribosomal RNA (rRNA-). The genome reference is NCBI\_GCF\_000003055.6; HT-Seq (v0.5.3p9) software was used to analyze the coverage of different known gene types of the species samples, using the model of union; We use different aligner for mRNA and circRNA. Quantitative analysis of mRNA was performed using cuffdiff<sup>1</sup> (<http://cole-trapnell-lab.github.io/cufflinks/cuffdiff/index.html>) software.

circFUT10

GTCGTGGTTGAGCTGGGAAAATTTGAAGGCAAGAAGTTTAAAAATTCTCATTTAAA

AGATGGACATGCACAAATGGAAGCAGAGCCTCTCCACCTCCATCCGTTCTTTAATA

GAGAAGGACTGACCCTGAACAGGAAGAAGACATTGGCAGCTGACAGCTTCCCCAT

CATGCTCTGGTGGTCCCCACTGACTGGGGAAACCGGAAGGCTCAGCCAGTGTGGG

GCGGATGCTTGCTTCTTCACCATCAACCGGACCTACCTCCATCATCACAGGACCAA

AGCCTTCCTCTTCTATG
